# Supplementary material for: Intensive Care Unit-Acquired Weakness: A nationwide survey on diagnostics, monitoring and treatment strategies on German intensive care units
Source: Anaesthesiologie. 2022 Feb 2;71(8):618–25. [Article in German] doi: 10.1007/s00101-022-01089-9 (PMC9352631; doi:10.1007/s00101-022-01089-9)
Supplement: Supplementary file 1 [file 101_2022_1089_MOESM1_ESM.pdf]

|                                                                              |        |                                                           |
|------------------------------------------------------------------------------|--------|-----------------------------------------------------------|
| EvaSys                                                                       | [Copy] |                                                           |
| Universitätsmedizin Rostock<br>Klinik und Poliklinik für Anästhesiologie und |        | AG NeuroIntens<br>Intensive Care Unit - Acquired Weakness |

Bitte so markieren: ☐ ☒ ☐ ☐ ☐

Korrektur: ☐ ☒ ☐ ☒ ☐

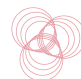

## 1. Einwilligung zur Teilnahme

**1.1 Die Teilnahme an dieser Studie ist freiwillig. Ihre Daten werden anonym behandelt, sodass nach der Auswertung kein individueller Rückschluss möglich ist. Die Datenerhebung wird voraussichtlich bis Juli 2021 abgeschlossen sein.**

☐ Ja, ich bin einverstanden und möchte an dieser Umfrage teilnehmen.

## 2. Demografische Basisdaten

**2.1 In welchem Bundesland befindet sich Ihre Klinik?**

- |                                              |                                                 |                                             |
|----------------------------------------------|-------------------------------------------------|---------------------------------------------|
| <input type="checkbox"/> Baden-Württemberg   | <input type="checkbox"/> Bayern                 | <input type="checkbox"/> Berlin             |
| <input type="checkbox"/> Brandenburg         | <input type="checkbox"/> Bremen                 | <input type="checkbox"/> Hamburg            |
| <input type="checkbox"/> Hessen              | <input type="checkbox"/> Mecklenburg-Vorpommern | <input type="checkbox"/> Niedersachsen      |
| <input type="checkbox"/> Nordrhein-Westfalen | <input type="checkbox"/> Rheinland-Pfalz        | <input type="checkbox"/> Saarland           |
| <input type="checkbox"/> Sachsen             | <input type="checkbox"/> Sachsen-Anhalt         | <input type="checkbox"/> Schleswig-Holstein |
| <input type="checkbox"/> Thüringen           |                                                 |                                             |

**2.2 Bitte ordnen Sie Ihre Klinik in eine der folgenden Versorgungsstufen ein:**

- |                                                                 |                                                |                                            |
|-----------------------------------------------------------------|------------------------------------------------|--------------------------------------------|
| <input type="checkbox"/> Grundversorgung                        | <input type="checkbox"/> Schwerpunktversorgung | <input type="checkbox"/> Maximalversorgung |
| <input type="checkbox"/> Maximalversorgung (Universitätsklinik) |                                                |                                            |

**2.3 Bitte geben Sie die Gesamtzahl der Intensivbetten auf Ihrer Intensivstation an.**

- |                              |                                |                                |
|------------------------------|--------------------------------|--------------------------------|
| <input type="checkbox"/> <10 | <input type="checkbox"/> 10-20 | <input type="checkbox"/> 21-50 |
| <input type="checkbox"/> >50 |                                |                                |

**2.4 Bitte ordnen Sie Ihre Intensivstation gemäß dem primären Behandlungsspektrum in eine der nachfolgenden Kategorien ein.**

- |                                                                         |                                                            |                                                        |
|-------------------------------------------------------------------------|------------------------------------------------------------|--------------------------------------------------------|
| <input type="checkbox"/> Perioperative Intensivstation                  | <input type="checkbox"/> Internistische Intensivstation    | <input type="checkbox"/> Neurologische Intensivstation |
| <input type="checkbox"/> Interdisziplinäre pädiatrische Intensivstation | <input type="checkbox"/> Interdisziplinäre Intensivstation |                                                        |

## 2. Demografische Basisdaten [Fortsetzung]

2.5 Welche Position vertreten Sie auf Ihrer Intensivstation / in Ihrem Klinikum?

- ☐ Klinikdirektor / Chefarzt
 ☐ Oberarzt
 ☐ Facharzt  
☐ Weiterbildungsassistent

2.6 Wie viele Jahre Berufserfahrung haben Sie insgesamt in der Intensivmedizin?

- ☐ <5
 ☐ 5-10
 ☐ >10

2.7 Beschäftigen Sie sich an Ihrer Klinik forschungsmäßig mit dem Thema neuromuskuläre Schwäche des Intensivpatienten bzw. ICU-AW?

- ☐ Ja
 ☐ Nein

## 3. Diagnostik der ICU-AW

3.1 In der wissenschaftlichen Literatur sind eine Vielzahl von Begriffen zur Beschreibung neu erworbener neuromuskulärer Störungen bei Intensivpatienten bekannt.

Welche der nachfolgenden Begriffe zur Beschreibung neu erworbener neuromuskulärer Störungen verwenden Sie auf Ihrer Intensivstation?

Bitte wählen Sie alle zutreffenden Antwortmöglichkeiten aus.

- ☐ Critical Illness Myopathie (CIM)
 ☐ Critical Illness Polyneuropathie (CIP)
 ☐ Critical Illness Polyneuromyopathie (CIPNM)  
☐ Intensive Care Unit - Acquired Weakness (ICU-AW)
 ☐ Andere, hier nicht genannte
 ☐ Keine

3.2 Wenn Sie eine andere Begrifflichkeit für die auf Ihrer Intensivstation erfassten, neu erworbenen neuromuskulären Störungen verwenden, können Sie diese hier aufführen.

(Bitte nur ausführen, wenn Sie in Frage 3.1 die Antwortmöglichkeit "Andere, hier nicht genannte" ausgewählt haben)

3.3 Gab es bei Ihnen im vergangenen Jahr eine klinikinterne Fortbildung zum Thema neuromuskuläre Störungen und assoziierte Komplikationen des Intensivpatienten?

- ☐ Ja
 ☐ Nein

## 3. Diagnostik der ICU-AW [Fortsetzung]

3.4 Gibt es zum jetzigen Zeitpunkt auf Ihrer Intensivstation ein strukturiertes diagnostisches Vorgehen zur Detektion einer ICU-AW (z.B. eine hausinterne SOP)?

☐ Ja

☐ Nein

3.5 Die aktuell gültige S3-Leitlinie Invasive Beatmung und Einsatz extrakorporaler Verfahren bei akuter respiratorischer Insuffizienz (AWMF Leitlinien-Register Nr. 001-021) empfiehlt die frühzeitige Sicherung der Diagnose ICU-AW durch die Anwendung eines systematischen Screenings auf der Intensivstation.

Bitte geben Sie an, welche der nachfolgenden Methoden auf Ihrer Intensivstation für ein systematisches Screening zur Diagnosestellung der ICU-AW genutzt werden.

Bitte wählen Sie alle zutreffenden Antwortmöglichkeiten aus.

☐ Klinisch-neurologische Untersuchung

☐ Anwendung von selektiven Scores (z.B. Medical Research Council sum score, MRC-SS)

☐ Elektroneurographie (ENG) / Elektromyographie (EMG)

☐ Neuromuskulärer Ultraschall

☐ Labor-/ Biomarkerdiagnostik

☐ Muskel-/Nervenbiopsie

☐ Andere, hier nicht genannte

☐ Keine

3.6 Wenn Sie andere Methoden für ein systematisches Screening zur Diagnosestellung der ICU-AW auf Ihrer Intensivstation verwenden, können Sie diese hier auflisten.

(Bitte nur ausführen, wenn Sie in Frage 3.5 die Antwortmöglichkeit "Andere, hier nicht genannte" ausgewählt haben)

3.7 Bitte geben Sie an, unter welchen Umständen Sie einen Patienten auf Ihrer Intensivstation aktuell auf das mögliche Vorliegen einer ICU-AW untersuchen.

Bitte wählen Sie alle zutreffenden Antwortmöglichkeiten aus.

☐ Routinemäßig, im Rahmen der täglichen klinischen Untersuchung

☐ Wenn Grunderkrankung und Erkrankungsschwere dies wahrscheinlich machen

☐ Wenn der Patient über einen längeren Zeitraum eine reduzierte oder keine motorische Eigenaktivität zeigt

☐ Wenn der Patient einen erfolglosen Weaningversuch bei invasiver Beatmung hatte

☐ Andere, hier nicht genannte

☐ Keine

## 3. Diagnostik der ICU-AW [Fortsetzung]

**3.8 Wenn Sie Patienten auf Ihrer Intensivstation unter anderen Umständen auf das mögliche Vorliegen einer ICU-AW untersuchen, können Sie diese hier auflühren.**

**(Bitte nur ausführen, wenn Sie in Frage 3.7 die Antwortmöglichkeit "Andere, hier nicht genannte" ausgewählt haben)**

**3.9 In welchen zeitlichen Abständen führen Sie ein Screeningverfahren zur Diagnostik einer ICU-AW durch?**

☐ Einmal pro Aufenthalt des Patienten

☐ Einmal täglich

☐ Einmal pro Schicht

☐ Ein Screening wird nicht durchgeführt

**3.10 Wer sollte aus Ihrer Sicht ein Screeningverfahren zur Detektion der ICU-AW vorrangig durchführen?**

☐ Pflegepersonal

☐ Ärztliches Personal

☐ Physiotherapeuten

**3.11 Wer führt aktuell tatsächlich ein Screeningverfahren zur Detektion der ICU-AW auf Ihrer Intensivstation durch?**

☐ Pflegepersonal

☐ Ärztliches Personal

☐ Physiotherapeuten

## 4. Monitoring der ICU-AW

4.1 Gibt es zum jetzigen Zeitpunkt auf Ihrer Intensivstation ein strukturiertes Konzept für die weiterführende Intensivbehandlung, wenn die Diagnose einer ICU-AW gestellt wurde (z.B. intensivierte Physiotherapie oder angepasste Weaningstrategien bei Beatmung)?

☐ Ja

☐ Nein

4.2 Führen Sie nach der Diagnosestellung einer ICU-AW weiterführende Diagnostik auf Ihrer Intensivstation durch?

Bitte wählen Sie alle zutreffenden Antwortmöglichkeiten aus.

☐ Elektrophysiologische Untersuchungen (Elektroneuro-/ Elektromyographie)

☐ Neuromuskulärer Ultraschall

☐ Muskel-/ Nervenbiopsie

☐ Anmeldung eines neurologischen Konsils

☐ Labor-/ Biomarkerdiagnostik

☐ Andere, hier nicht genannte

☐ Keine

4.3 Wenn Sie andere Untersuchungen zur weiterführenden Diagnostik nach Detektion einer ICU-AW auf Ihrer Intensivstation durchführen, können Sie diese hier auflisten.

(Bitte nur auflisten, wenn Sie in Frage 4.2 die Antwortmöglichkeit "Andere, hier nicht genannte" ausgewählt haben)

4.4 Welche der folgenden Methoden verwenden Sie zur Verlaufskontrolle der ICU-AW im Rahmen der Intensivbehandlung?

Bitte wählen Sie alle zutreffenden Antwortmöglichkeiten aus.

☐ Klinisch-neurologische Untersuchung

☐ Anwendung selektiver Scores (z.B. Medical Research Council sum score, MRC-SS)

☐ Elektroneurographie (ENG) / Elektromyographie (EMG)

☐ Neuromuskulärer Ultraschall

☐ Labor-/ Biomarkerdiagnostik

☐ Muskel-/ Nervenbiopsie

☐ Andere, hier nicht genannte

☐ Keine

## 4. Monitoring der ICU-AW [Fortsetzung]

**4.5 Wenn Sie andere Methoden zum Monitoring des Krankheitsverlaufs einer ICU-AW auf Ihrer Intensivstation verwenden, können Sie diese hier auflühren.**

**(Bitte nur ausführen, wenn Sie in Frage 4.4 die Antwortmöglichkeit "Andere, hier nicht genannte" ausgewählt haben)**

**4.6 Welchen der nachfolgenden Scores verwenden Sie, um die körperliche Einschränkung Ihrer Intensivpatienten mit ICU-AW einzuschätzen?**

☐ Functional Independance Measure (FIM)

☐ Physical Function in the ICU Test (PFIT)

☐ Functional Status Score for ICU (FSS-ICU)

☐ Acute Care Index of Function (ACIF)

☐ Andere, hier nicht genannte

☐ Keine

**4.7 Wenn Sie andere Scores zur Erfassung der körperlichen Einschränkungen von Patienten mit ICU-AW auf Ihrer Intensivstation verwenden, können Sie diese hier auflühren.**

**(Bitte nur ausführen, wenn Sie in Frage 4.6 die Antwortmöglichkeit "Andere, hier nicht genannte" ausgewählt haben)**

## 5. Klinisch-therapeutische Konsequenzen

### 5.1 Welche weiterführenden intensivmedizinischen Konzepte werden nach Diagnosestellung einer ICU-AW auf Ihrer Intensivstation umgesetzt?

Bitte wählen Sie alle zutreffenden Antwortmöglichkeiten aus.

- |                                                                                                |                                                                             |                                                                                          |
|------------------------------------------------------------------------------------------------|-----------------------------------------------------------------------------|------------------------------------------------------------------------------------------|
| <input type="checkbox"/> Einleitung bzw. Intensivierung einer physiotherapeutischen Behandlung | <input type="checkbox"/> Anwendung neuromuskulärer elektrischer Stimulation | <input type="checkbox"/> Intensivierte Insulintherapie zur Vermeidung von Hyperglykämien |
| <input type="checkbox"/> Vermeidung von Muskelrelaxantien                                      | <input type="checkbox"/> Vermeidung von Kortikosteroiden                    | <input type="checkbox"/> Reduktion der Sedativagabe                                      |
| <input type="checkbox"/> Andere, hier nicht genannte                                           | <input type="checkbox"/> Keine                                              |                                                                                          |

### 5.2 Wenn Sie andere intensivmedizinische Konzepte nach Diagnosestellung einer ICU-AW umsetzen, können Sie diese hier auflisten.

(Bitte nur ausführen, wenn Sie in Frage 5.1 die Antwortmöglichkeit "Andere, hier nicht genannte" ausgewählt haben)

### 5.3 Wie oft ist auf Ihrer Intensivstation eine physiotherapeutische Behandlung bei Patienten mit ICU-AW in der klinischen Routine realisierbar?

- |                                                      |                                             |                                         |
|------------------------------------------------------|---------------------------------------------|-----------------------------------------|
| <input type="checkbox"/> Mehrmals pro Schicht        | <input type="checkbox"/> Einmal pro Schicht | <input type="checkbox"/> Einmal täglich |
| <input type="checkbox"/> In unregelmäßigen Abständen | <input type="checkbox"/> Gar nicht          |                                         |

### 5.4 Wo sehen Sie aktuell Defizite in der Versorgung von Intensivpatienten mit ICU-AW?

Bitte wählen Sie alle zutreffenden Antwortmöglichkeiten aus, die am ehesten zutreffen.

- |                                                                                                  |                                                                                                                         |                                                                     |
|--------------------------------------------------------------------------------------------------|-------------------------------------------------------------------------------------------------------------------------|---------------------------------------------------------------------|
| <input type="checkbox"/> In der Verfügbarkeit von diagnostischen / therapeutischen Möglichkeiten | <input type="checkbox"/> In der Zeit, die dem medizinischen Personal für die intensivste Behandlung zur Verfügung steht | <input type="checkbox"/> In der Verfügbarkeit von Physiotherapeuten |
| <input type="checkbox"/> In der Verfügbarkeit von Pflegekräften                                  | <input type="checkbox"/> Im spezifischen Fachwissen des medizinischen Personals                                         | <input type="checkbox"/> Andere, hier nicht genannte                |
| <input type="checkbox"/> Keine Defizite vorhanden                                                |                                                                                                                         |                                                                     |

## 5. Klinisch-therapeutische Konsequenzen [Fortsetzung]

5.5 Wenn Sie andere Defizite in der Versorgung von Intensivpatienten mit ICU-AW sehen, können Sie diese hier auflühren.

(Bitte nur ausführen, wenn Sie in Frage 5.4 die Antwortmöglichkeit "Andere, hier nicht genannte" ausgewählt haben)

5.6 Werden Angehörige über mögliche längerfristig bestehende körperliche Einschränkungen des Patienten mit ICU-AW aufgeklärt?

☐ Ja

☐ Nein

5.7 Wird die Diagnose einer neu erworbenen neuromuskulären Störung im Rahmen der Intensivtherapie bzw. ICU-AW in der Epikrise des Patienten aufgeführt?

☐ Ja

☐ Nein

☐ Nicht regelhaft

5.8 Sollte aus Ihrer Sicht eine standardisierte Empfehlung im Sinne einer spezifischen Leitlinien zu Diagnostik, Monitoring und klinisch-therapeutischen Ansätzen bei ICU-AW entwickelt werden?

☐ Ja

☐ Nein

5.9 Abschließend möchten wir die Umfrage mit einer Testfrage zum Thema Diagnostik der ICU-AW beenden.

Welche der nachfolgenden Aussagen trifft NICHT auf den Medical Research Council sum score (MRC-SS) zu:

☐ Die Fähigkeit zur Mitarbeit des Patienten (bewertet mittels initialem Score of five questions) spielt bei der Durchführung des MRC-SS keine Rolle

☐ Standardisierte Untersuchungsbedingungen sollten stets vorhanden sein

☐ Der MRC-SS kann auch Vorliegen einer Hemiparese oder Monoparese einer Extremität angewendet werden

☐ Auch beatmete Patienten können mittels MRC-SS untersucht werden

## 5. Klinisch-therapeutische Konsequenzen [Fortsetzung]

### 5.10 Haben Sie noch abschließende Anmerkungen zur Umfrage?
